# Supplementary material for: Coordinated circadian timing through the integration of local inputs in Arabidopsis thaliana
Source: PLoS Biol. 2019 Aug 15;17(8):e3000407. doi: 10.1371/journal.pbio.3000407 (PMC6695092; doi:10.1371/journal.pbio.3000407)
Supplement: S1 File — N, n, rhythmicity scores, and test statistics for the periods presented in all figures. Values are separated by sheet, each corresponding to the data presented in one or more of the figures. (XLSX) [file pbio.3000407.s027.xlsx]

## Sheet: Fig 2 & 4
Comparison of mean period estimates relating to Fig 2 and 4.
Treatment	Tissue	N; n1	Percentage rhythmic	Period (h) (mean ± S.D.)	Degrees of freedom (between; within)	Chi-squared	p-value
LD-to-LL; GI::LUC	Cotyledon	4; 26	96	23.82 ± 0.60	3; 98	84.35	3.57e-18
	Hypocotyl	4; 26	100	25.41 ± 0.91
	Root	4; 26	100	28.04 ± 0.86
	RT	4; 26	96	26.90 ± 0.45
LD-to-LD; GI::LUC	Cotyledon	3; 35	91	24.41 ± 0.39	3; 123	39.82	1.16e-08
	Hypocotyl	3; 35	100	24.22 ± 0.48
	Root	3; 35	71	23.82 ± 0.18
	RT	3; 35	100	23.91 ± 0.17
Note: One-way ANOVA with an alpha level of 0.05 was used for comparison of periods. 1N represents the number of independent experiments, n the total number of tracked tissues from individual seedlings. Organs that were not trackable due to their physical orientation were excluded from further statistics.
Post hoc pairwise comparisons p-values for the comparison of mean period estimates relating to Fig 2 and 4.
Comparison	Treatment
	LD-to-LL; GI::LUC	LD-to-LD; GI::LUC
Cotyledon v. Hypocotyl	0.0159	0.18
Cotyledon v. Root	3.7683e-09	1.24e-07
Cotyledon v. RT	2.2939e-08	1.65e-05
Hypocotyl v. Root	5.179e-08	0.000708
Hypocotyl v. RT	0.0139	0.0311
Root v. RT	0.035	0.54
Note: Tukey's post hoc method was used for the comparison of groups.

## Sheet: Fig 3
Comparison of mean period estimates relating to Fig 3.
Treatment	Tissue	N; n1	Percentage rhythmic	Period (mean ± S.D.)	Degrees of freedom	t-statistic	p-value
Hypocotyl cut	Cotyledon	4; 15	100	23.84 ± 0.57	24.55	-0.54	0.595
	Hypocotyl	4; 15	100	25.27 ± 0.92	19.2031	-0.206	0.839
	Root	4; 17	100	28.24 ± 0.89	17.19	-0.86	0.4014
	RT	4; 17	100	27.50 ± 0.32	17.35	2.0925	0.00084
Hypocotyl cut control	Cotyledon	4; 12	100	23.95 ± 0.52
	Hypocotyl	4; 12	100	25.36 ± 1.30
	Root	4; 12	100	28.64 ± 1.40
	RT	4; 12	100	26.87 ± 0.47
RT cut	Cotyledon	3; 10	80	24.69 ± 0.88	12.3403	1.3859	0.1903
	Hypocotyl	3; 9	89	26.11 ± 0.82	15.7692	0.34255	0.73646
	Root	3; 10	90	29.48 ± 0.80	17.6121	1.1705	0.2574
	RT	3; 9	89	27.49 ± 0.34	16.1194	1.1685	0.25961
RT cut control	Cotyledon	3; 11	100	24.18 ± 0.65
	Hypocotyl	3; 11	100	25.97 ± 0.87
	Root	3; 11	100	29.04 ± 0.86
	RT	3; 11	100	27.22 ± 0.62
Hypocotyl & RT cut	Cotyledon	3; 15	93	24.57 ± 1.40	20.99	1.21	0.24
	Hypocotyl	3; 13	77	26.36 ± 1.04	14.87	1.94	0.0712
	Root	3; 16	94	27.93 ± 1.17	24.91	-1.49	0.1494
	RT	3; 16	94	26.92 ± 0.36	10.61	0.14	0.89
Hypocotyl & RT cut control	Cotyledon	3; 12	75	24.00 ± 0.88
	Hypocotyl	3; 11	82	25.60 ± 0.61
	Root	3; 12	100	28.52 ± 0.87
	RT	3; 12	83	26.87 ± 0.99
Note: t-test (with Welch correction) was used for comparison of mean period with control. Comparison is with matching tissue in appropriate control. 1N represents the number of independent experiments, n the total number of tracked tissues from individual seedlings. Organs that were not trackable due to their physical orientation were excluded from further statistics.

## Sheet: Fig 6
Comparison of mean period estimates relating to Fig 6.
Treatment	Tissue	N; n1	Percentage rhythmic	Period (mean ± S.D.)	Degrees of freedom	t-statistic	p-value
Constant darkness	Cotyledon	3; 31	68	31.00 ± 2.45	22.05	13.01	7.0011e-12
	Hypocotyl	3; 31	97	27.92 ± 1.45	49.37	7.85	3.0452e-10
	Root	3; 31	97	28.07 ± 1.18	52.47	0.0916	0.9273
	RT	3; 31	90	24.08 ± 0.89	40.81	-14.75	6.0024e-18
Red & blue light	Cotyledon	4; 26	96	23.82 ± 0.60
	Hypocotyl	4; 26	100	25.41 ± 0.91
	Root	4; 26	100	28.04 ± 0.86
	RT	4; 26	96	26.90 ± 0.45
phyb-9, red light	Cotyledon	4; 33	70	29.17 ± 1.16	35.77	12.01	4.1653e-14
	Hypocotyl	4; 33	79	28.87 ± 1.75	33.52	4.06	0.00027831
	Root	4; 35	77	28.91 ± 1.20	45.75	-1.07	0.2907
	RT	4; 34	24	28.72 ± 1.33	10.66	4.23	0.0015
WT control (relating to phyb-9, red light)	Cotyledon	4; 23	100	25.78 ± 0.69
	Hypocotyl	4; 23	96	27.36 ± 0.68
	Root	4; 23	100	29.21 ± 0.81
	RT	4; 23	96	26.50 ± 1.09
Note: t-test (with Welch correction) was used for comparison of mean period with control. Comparison is with matching tissue in appropriate control treatment. For constant darkness the comparison is with the red & blue light treatment. 1N represents the number of independent experiments, n the total number of tracked tissues from individual seedlings. Organs that were not trackable due to their p…

## Sheet: Fig 7
Comparison of mean period estimates relating to Fig 7.
Treatment	Tissue	N; n1	Percentage rhythmic	Period (mean ± S.D.)	Degrees of freedom	t-statistic	p-value
DCMU	Cotyledon	3; 15	93.33	27.28 ± 0.84	14.13	6.83	7.74e-06
	Hypocotyl	3; 15	86.67	28.83 ± 1.57	17.58	4.54	0.000269
	Root	3; 15	100	28.82 ± 1.10	16.66	-0.010949	0.99144
	RT	3; 14	100	27.48 ± 0.84	16.82	0.265	0.796
WT control (relating to DCMU)	Cotyledon	3; 8	100	24.65 ± 0.88	20	6.9248	1.0047e-06
	Hypocotyl	3; 8	100	26.36 ± 0.86	19	3.5659	0.0020623
	Root	3; 9	100	28.82 ± 1.12	22	-0.010949	0.99136
	RT	3; 9	100	27.38 ± 0.87	21	0.26434	0.79409
Exogenous sucrose, constant darkness	Top-of-root	3; 24	80	24.44 ± 0.97	43.04	-13.33	7.01e-17
	Mid-root	3; 30	100	27.76 ± 0.76
Exogenous mannitol, constant darkness	Top-of-root	2; 20	91	26.34 ± 0.56	38.37	-5.57	2.14e-07
	Mid-root	2; 22	100	27.27 ± 0.51
Note: t-test (with Welch correction) was used for comparison of mean period with control. Comparison is with the matching tissue in appropriate control. treatment. For exogenous sucrose treatment, the comparison is with the exogenous mannitol treatment. 1N represents the number of independent experiments, n the total number of tracked tissues from individual seedlings. Organs that were not tracka…

## Sheet: S2 Fig
Comparison of mean period estimates relating to S2 Fig.
Treatment	Tissue	N; n1	Percentage rhythmic	Period (h) (mean ± S.D.)	Degrees of freedom (between; within)	Chi-squared	p-value
LD-to-LL; PRR9::LUC	Cotyledon	3; 11	64	22.93 ± 0.92	3; 36	27.7	4.19e-06
	Hypocotyl	3; 12	75	24.72 ± 1.70
	Root	3; 12	100	27.82 ± 1.39
	RT	3; 12	100	26.06 ± 0.36
LD-to-LL; TOC1::LUC	Cotyledon	3; 13	100	23.08 ± 0.62	3; 42	38.49	2.22e-08
	Hypocotyl	3; 12	92	26.20 ± 1.04
	Root	3; 13	85	28.93 ± 0.45
	RT	3; 13	85	27.38 ± 0.95
LD-to-LL; ELF4::LUC	Cotyledon	3; 18	100	23.70 ± 0.83	3; 53	48.83	1.4196e-10
	Hypocotyl	3; 18	94	25.81 ± 0.63
	Root	3; 18	67	28.31 ± 0.99
	RT	3; 18	56	26.75 ± 0.57
Note: One-way ANOVA with an alpha level of 0.05 was used for comparison of periods. 1N represents the number of independent experiments, n the total number of tracked tissues from individual seedlings. Organs that were not trackable due to their physical orientation were excluded from further statistics.
Post hoc pairwise comparisons p-values for the comparison of mean period estimates relating to S2 Fig.
Comparison	Treatment
	LD-to-LL; PRR9::LUC	LD-to-LL; TOC1::LUC	LD-to-LL; ELF4::LUC
Cotyledon v. Hypocotyl	0.4969	0.04685	0.0082
Cotyledon v. Root	7.0824e-06	1.3227e-08	3.9399e-09
Cotyledon v. RT	0.0089	0.000517	4.4661e-05
Hypocotyl v. Root	0.001585	0.00527	0.0011
Hypocotyl v. RT	0.2772	0.58166	0.3041
Root v. RT	0.191	0.1757	0.3449
Note: Tukey's post hoc method was used for the comparison of groups.

## Sheet: S12 Fig
Comparison of mean period estimates relating to S12A Fig .
Treatment	Tissue	N; n1	Percentage rhythmic	Period (mean ± S.D.)	Degrees of freedom	t-statistic	p-value
cca1-11 GI::LUC	Cotyledon	4; 18	100	21.65 ± 1.00	16.45	-5.8	2.43e-05
	Hypocotyl	4; 18	94	23.00 ± 1.09	24.59	-8.46	9.54e-09
	Root	4; 18	56	25.68 ± 2.64	11.23	-2.72	0.0197
	RT	4; 18	94	23.58 ± 2.70	23.93	-4.84	6.22e-05
WT GI::LUC control, relating to cca1-11 GI::LUC	Cotyledon	4; 11	91	24.18 ± 1.16
	Hypocotyl	4; 11	100	25.83 ± 0.64
	Root	4; 11	100	28.09 ± 0.98
	RT	4; 11	100	27.22 ± 1.22
prr7-3 GI::LUC	Cotyledon	3; 9	89	22.90 ± 0.67	17.53	-3.36	0.0036
	Hypocotyl	3; 9	67	24.03 ± 0.65	12.2	-3.32	0.006
	Root	3; 9	100	26.40 ± 0.77	18.99	-4.13	0.000564
	RT	3; 9	100	25.93 ± 0.34	18.95	-4.56	0.000214
WT GI::LUC control, relating to prr7-3 GI::LUC	Cotyledon	3; 12	100	24.06 ± 0.87
	Hypocotyl	3; 12	100	25.20 ± 0.80
	Root	3; 12	100	28.06 ± 1.07
	RT	3; 12	100	26.71 ± 0.44
prr9-1 GI::LUC	Cotyledon	2; 7	100	24.99 ± 0.98	9.85	1.85	0.094
	Hypocotyl	2; 7	100	27.88 ± 1.15	6.93	6.02	0.000554
	Root	2; 7	100	30.92 ± 0.70	9.1	0.91	0.39
	RT	2; 7	86	28.51 ± 1.24	5.11	2.49	0.0539
WT GI::LUC control, relating to prr9-1 GI::LUC	Cotyledon	2; 5	100	24.05 ± 0.76
	Hypocotyl	2; 5	100	25.16 ± 0.27
	Root	2; 5	100	30.56 ± 0.96
	RT	2; 5	60	27.24 ± 0.09
toc1-101 GI::LUC	Cotyledon	2; 8	88	21.17 ± 0.24	12.7852	-13.7065	5.1114e-09
	Hypocotyl	2; 8	100	22.25 ± 0.57	10.8688	-7.0865	2.1617e-05
	Root	2; 8	75	25.54 ± 1.63	10.3978	4.1967	0.0017
	RT	2; 8	25	22.73 ± 0.12	9.3374	-17.1863	2.208e-08
WT GI::LUC control, relating to toc1-101 GI::LUC	Cotyledon	2; 10	80	23.12 ± 0.31
	Hypocotyl	2; 10	90	25.84 ± 1.39
	Root	2; 10	90	29.05 ± 1.53
	RT	2; 10	100	26.17 ± 0.57
lux-4 GI::LUC	Cotyledon	2; 13	62	21.27 ± 0.91	14.71	-4.74	0.00027914
	Hypocotyl	2; 13	85	25.08 ± 0.43	17.06	-2.14	0.0475
	Root	2; 13	69	28.91 ± 0.84	13.58	1.39	0.1862
	RT	2; 13	15	22.76 ± 0.87	1.084	-5.9853	0.0922
WT GI::LUC control, relating to lux-4 GI::LUC	Cotyledon	2; 9	100	23.69 ± 1.19
	Hypocotyl	2; 9	100	25.49 ± 0.44
	Root	2; 9	100	28.18 ± 1.32
	RT	2; 9	100	26.51 ± 0.37
Note: t-test (with Welch correction) was used for comparison of mean period with control. Comparison is with matching tissue in appropriate control. 1N represents the number of independent experiments, n the total number of tracked tissues from individual seedlings. Organs that were not trackable due to their physical orientation were excluded from further statistics.
Comparison of mean period estimates relating to S12B Fig.
Treatment	Tissue	N; n1	Percentage rhythmic	Period change relative to cotyledon (mean ± S.D.)	Degrees of freedom	t-statistic	p-value
cca1-11 GI::LUC	Cotyledon	4; 18	100
	Hypocotyl	4; 18	94	1.17 ± 0.88	15.71	-1.04	0.3155
	Root	4; 18	56	4.18 ± 3.05	13.51	0.27	0.7897
	RT	4; 18	94	1.92 ± 2.28	20.94	-1.89	0.0723
WT GI::LUC control, relating to cca1-11 GI::LUC	Cotyledon	4; 11	91
	Hypocotyl	4; 11	100	1.60 ± 1.13
	Root	4; 11	100	3.88 ± 1.58
	RT	4; 11	100	3.06 ± 0.73
prr7-3 GI::LUC	Cotyledon	3; 9	89
	Hypocotyl	3; 9	67	0.89 ± 0.78	15.07	-0.5	0.6228
	Root	3; 9	100	3.61 ± 1.08	17.78	-0.68	0.5049
	RT	3; 9	100	3.07 ± 0.81	17.58	1	0.3294
WT GI::LUC control, relating to prr7-3 GI::LUC	Cotyledon	3; 12	100
	Hypocotyl	3; 12	100	1.14 ± 1.28
	Root	3; 12	100	4.00 ± 1.49
	RT	3; 12	100	2.65 ± 1.07
prr9-1 GI::LUC	Cotyledon	2; 7	100
	Hypocotyl	2; 7	100	2.89 ± 1.69	9.66	2.34	0.0424
	Root	2; 7	100	5.93 ± 1.56	9.88	-0.79	0.4505
	RT	2; 7	86	3.34 ± 2.05	5.46	-0.38	0.7216
WT GI::LUC control, relating to prr9-1 GI::LUC	Cotyledon	2; 5	100
	Hypocotyl	2; 5	100	1.10 ± 0.95
	Root	2; 5	100	6.50 ± 0.96
	RT	2; 5	60	3.66 ± 0.32
toc1-101 GI::LUC	Cotyledon	2; 8	88
	Hypocotyl	2; 8	100	1.01 ± 0.50	7.3274	-2.8042	0.0252
	Root	2; 8	75	3.78 ± 0.46	7.2286	-3.0477	0.0179
	RT	2; 8	25	1.64 ± 0.14	7.9906	-5.0915	0.00094311
WT GI::LUC control, relating to toc1-101 GI::LUC	Cotyledon	2; 10	80
	Hypocotyl	2; 10	90	2.69 ± 1.50
	Root	2; 10	90	5.78 ± 1.65
	RT	2; 10	100	3.02 ± 0.71
lux-4 GI::LUC	Cotyledon	2; 13	62
	Hypocotyl	2; 13	85	3.79 ± 0.72	14.99	5.26	9.6257e-05
	Root	2; 13	69	7.84 ± 1.43	13.69	3.69	0.0025
	RT	2; 13	15	0.89 ± 0.98	1.723	-2.42	0.1563
WT GI::LUC control, relating to lux-4 GI::LUC	Cotyledon	2; 9	100
	Hypocotyl	2; 9	100	1.80 ± 0.84
	Root	2; 9	100	4.49 ± 2.19
	RT	2; 9	100	2.82 ± 1.18
Note: t-test (with Welch correction) was used for comparison of mean period with control. Comparison is with matching tissue in appropriate control. 1N represents the number of independent experiments, n the total number of tracked tissues from individual seedlings. Organs that were not trackable due to their physical orientation were excluded from further statistics.

## Sheet: S14-16 Figs
Comparison of mean period estimates relating to S14-16 Fig.
Treatment	Tissue	N; n1	Percentage rhythmic	Period (mean ± S.D.)	Degrees of freedom	t-statistic	p-value
Dark grown roots, constant darkness	Cotyledon	3; 15	100	32.02 ± 2.27	15.4	-0.76	0.46
	Hypocotyl	3; 15	67	29.52 ± 2.36	11.21	1.2	0.25
	Root	3; 15	100	29.44 ± 0.75	12.92	-1.82	0.0923
	RT	3; 15	87	24.61 ± 1.18	19.74	-0.41	0.689
Light grown roots, constant darkness	Cotyledon	3; 14	57	32.74 ± 2.10
	Hypocotyl	3; 14	100	28.57 ± 0.97
	Root	3; 14	79	30.43 ± 1.68
	RT	3; 14	100	24.77 ± 0.73
Red light	Cotyledon	2; 22	100	25.77 ± 0.95	34.73	8.29	9.5234e-10
	Hypocotyl	2; 22	95	27.34 ± 0.61	43.59	8.68	4.6751e-11
	Root	2; 22	82	28.92 ± 0.77	39.18	3.57	0.00097649
	RT	2; 22	55	26.67 ± 1.20	12.49	-0.63	0.5399
Blue light	Cotyledon	2; 24	100	25.09 ± 1.05	36.52	5.2	7.946e-06
	Hypocotyl	2; 23	91.3	26.17 ± 0.96	41.77	2.73	0.0091
	Root	2; 25	96	29.51 ± 1.05	44.61	5.39	2.524e-06
	RT	2; 25	96	25.96 ± 0.92	32.99	-4.47	8.74e-05
Red & blue light	Cotyledon	4; 26	96	23.82 ± 0.60
	Hypocotyl	4; 26	100	25.41 ± 0.91
	Root	4; 26	100	28.04 ± 0.86
	RT	4; 26	96	26.90 ± 0.45
phyb-9, constant darkness	Cotyledon	2; 18	56	31.68 ± 2.73	17.7	0.84	0.411
	Hypocotyl	2; 18	94.44	29.70 ± 1.70	23.56	2.69	0.013
	Root	2; 17	94.12	29.17 ± 1.07	30.92	-0.31	0.759
	RT	2; 18	72.22	24.70 ± 0.74	26.1	-0.79	0.4344
WT control (relating to phyb-9, darkness)	Cotyledon	2; 17	64.71	30.75 ± 2.29
	Hypocotyl	2; 17	88.24	28.45 ± 0.82
	Root	2; 17	100	29.29 ± 1.20
	RT	2; 17	94.12	24.98 ± 1.12
Note: t-test (with Welch correction) was used for comparison of mean period with control. Comparison is with the matching tissue in appropriate control treatment. For red light only and blue light only treatments, comparisn is with red & blue light treatment. 1N represents the number of independent experiments, n the total number of tracked tissues from individual seedlings. Organs that were not …
